# Supplementary material
Source: Elsevier journal article supplement (https://www.sciencedirect.com/science/article/pii/S2254887421001235)
Supplement: mmc1 [file S2254887421001235:mmc1.pdf]

**Appendix.** Survey completed by the study participants.

**ADHERENCE TO THE MEDITERRANEAN DIET BY HEALTHCARE PERSONNEL**

We request your collaboration in order to perform a cross-sectional study to evaluate adherence to the Mediterranean diet in healthcare personnel in the context of an undergraduate Senior Thesis.

The aim is to collect your honest responses to the questions posed below. The information provided will be completely anonymous and used only for research purposes.

**Professional category:**

- Nurse                       Assistant Nursing Technician                       Hospital porter  
 Doctor                       Resident                       Health Centre                       Medical specialty (non-emergency)                       Medical Student                       1<sup>st</sup> year  
                                           Medical specialty (emergency)                       2<sup>nd</sup> year  
                                           Medical-surgical specialty                       3<sup>rd</sup> year  
                                           Surgical specialty                       4<sup>th</sup> year  
                                           5<sup>th</sup> year  
                                           6<sup>th</sup> year  
                                           MIR (Resident Medical

**Shift:**  Set shift                       Rotating shift  
 Does your work schedule include **nights:**  yes  no  
 Do you work **on-call shifts:**  yes  no                      If yes:  ≤ 4/month  > 4/month

**Age:** \_\_\_\_                      **Sex:**  Male  Female                      **Height:** \_\_\_\_                      **Weight:** \_\_\_\_

**HTN:**  yes  no                      If yes, *are you in treatment:*  yes  no  
**Diabetes Mellitus:**  yes  no                      If yes, *are you in treatment:*  yes  no  
**Dyslipidaemia:**  yes  no                      If yes, *are you in treatment:*  yes  no  
**Ischaemic heart disease:**  yes  no  
**Peripheral artery disease:**  yes  no                      **Cerebrovascular accident:**  yes  no  
**COPD:**  yes  no                      **Chronic kidney disease:**  yes  no

**Alcohol:**

How often do you have a drink containing alcohol?  
 Never                       ≤1 time per month                       2-4 times per month  
 2-3 times per week                       ≥4 times per week  
 How many drinks containing alcohol do you have on a typical day when drinking?  
 1 or 2                       3 or 4                       5 or 6                       7 or 9  
 ≥10  
 How often do you have six or more alcoholic drinks on one occasion?  
 Never                       <1 time per month                       Monthly                       Weekly  
 Daily or almost daily

**Tobacco:**

- Non-smoker       Smoker       Ex-smoker (>1 year)

**Physical activity:**

How often do you do physical activity during your free time?:

- I do not do physical activity     1-2 weekly sessions        $\geq 3$  weekly sessions

How much time do you dedicate to said activity?:

- < 30 min. per session       30 min. - 1 h per session     >1 h per session

The effort exerted in said exercise is:

- Light       Moderate       Intense       Maximum exertion

Are you the person who regularly cooks in your home?  yes  no

Below, we are interested in learning about your eating habits. Please answer these questions related to your diet. Mark with an X:

| Question: (yes =1 point; no = 0 points)                                                                                                                             | Yes | No |
|---------------------------------------------------------------------------------------------------------------------------------------------------------------------|-----|----|
| 1. Do you use olive oil for cooking?                                                                                                                                |     |    |
| 2. Do you eat a total of $\geq 2$ tablespoons of olive oil throughout the day (including oil for frying, meals eaten outside the house, for salads, etc.)?          |     |    |
| 3. Do you eat $\geq 2$ servings of greens or vegetables per day, at least 1 of which is in salad or raw (side dishes or garnishes count as 1/2 serving)?            |     |    |
| 4. Do you eat $\geq 3$ pieces of fruit (including natural juice) per day?                                                                                           |     |    |
| 5. Do you eat <1 serving of red meat, hamburger meat, sausages, or cured meat per day (one serving is equal to 100-150 g)?                                          |     |    |
| 6. Do you eat <1 serving of butter, margarine, or cream per day (one serving is equal to 12 g)?                                                                     |     |    |
| 7. Do you drink <1 carbonated and/or sugary beverage (fizzy drinks, colas, tonic, bitters) per day?                                                                 |     |    |
| 8. Do you drink wine? Do you drink $\geq 3$ glasses per week?                                                                                                       |     |    |
| 9. Do you eat $\geq 3$ servings of legumes per week (one serving or plate is equal to 150 g)?                                                                       |     |    |
| 10. Do you eat $\geq 3$ servings of fish or seafood per week (one plate, piece, or portion is equal to 100-150 g of fish or 4-5 pieces of shellfish)?               |     |    |
| 11. Do you eat commercial pastries (not home-made) such as biscuits, puddings, sweets or cakes $\leq 3$ times per week?                                             |     |    |
| 12. Do you eat nuts $\geq 1$ time per week (one serving is equal to 30 g)?                                                                                          |     |    |
| 13. Do you preferentially eat chicken, turkey, or rabbit instead of beef, pork, hamburger meat or sausages (chicken: one piece or serving is equal to 100-150 g)?   |     |    |
| 14. Do you eat cooked vegetables, pasta, rice, or other dishes dressed with a sauce made from tomato, garlic, onion, or leek and olive oil $\geq 2$ times per week? |     |    |

Total score:

< 9 = low adherence

$\geq 9$  = good adherence
